# Supplementary material
Source: PubMed Central journal article supplement (PMC7685722)
Supplement: jci-130-141054-s223.pdf [file jci-130-141054-s223.pdf]

**Figure S1**

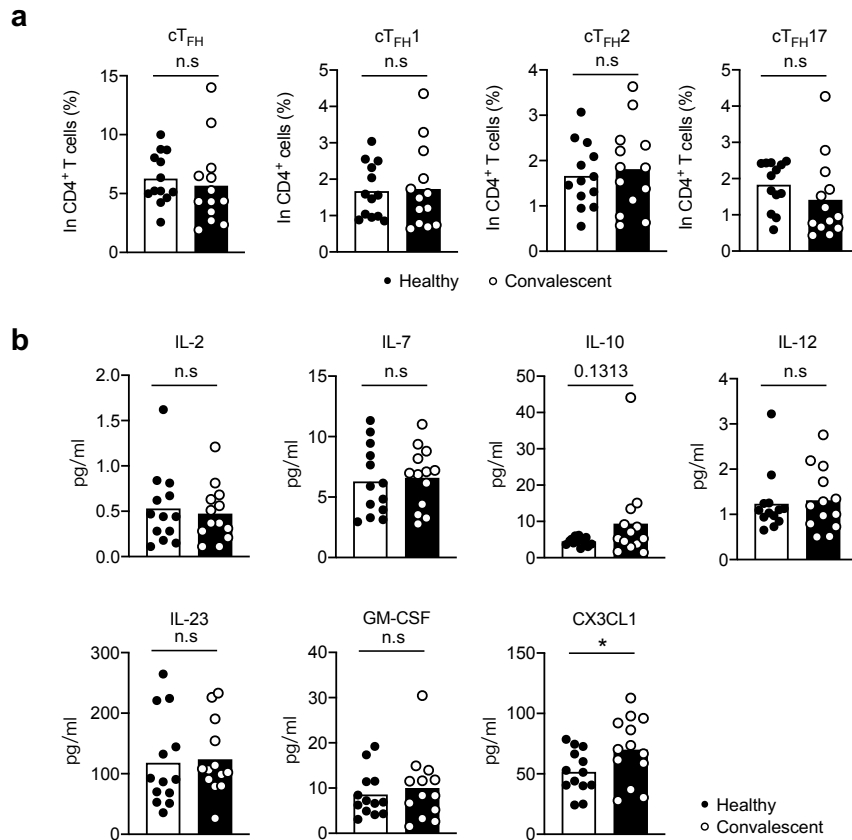

**Figure S1. Frequency of  $cT_{FH}$  cells in  $CD4^+$  T cells and plasma level of cytokines**

Blood samples were collected from COVID-19 convalescent patients ( $n=13$ ) and healthy individuals ( $n=13$ ). (a) Frequency of  $cT_{FH}$ ,  $cT_{FH1}$ ,  $cT_{FH2}$  and  $cT_{FH17}$  cells within  $CD4^+$  T cells in healthy individuals and COVID-19 convalescent patients (b) Plasma level of IL-2, IL-7, IL-10, IL-12, IL-23, GM-CSF and CX3CL1 were measured and the differences between healthy individuals and COVID-19 convalescent patients were analyzed. Each dot represents an individual subject. Bars represent the mean values. n.s., not significant; \* $P<0.05$  and \*\*  $P<0.01$  by unpaired and two-tailed Student's  $t$ -test.

Figure S2

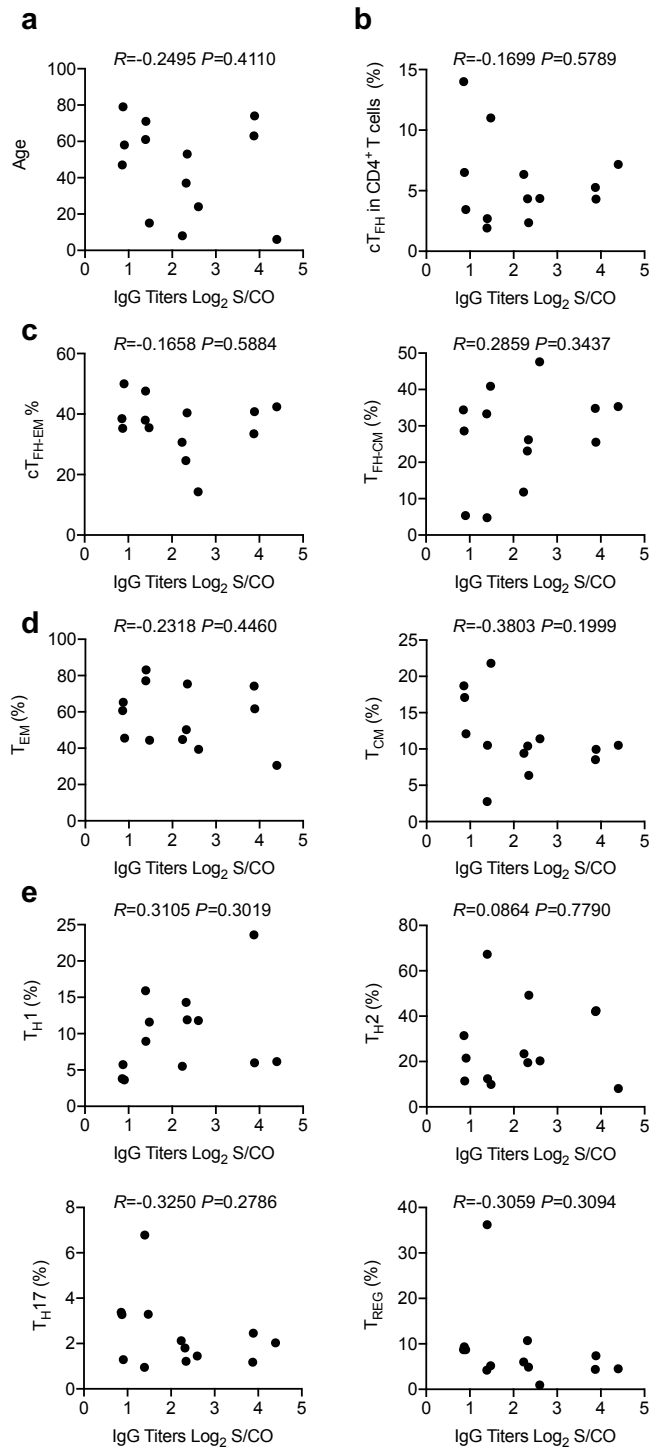

**Figure S2. Correlation analysis on SARS-CoV-2 specific IgG antibody titer**

Blood samples were collected from COVID-19 convalescent patients (n=13) and healthy individuals (n=13). Plasma were obtained after processing the blood to detect the antibodies specific to SARS-CoV-2 using chemiluminescent immunoassays (CLIA). (a) Correlation between age and SARS-CoV-2 specific IgG antibody titer. (b) Correlation between cT<sub>FH</sub> cells (%) and SARS-CoV-2 specific IgG antibody titer. (c) Correlation analysis on cT<sub>FH-EM</sub> cells (%) and cT<sub>FH-CM</sub> cells (%) with SARS-CoV-2 specific IgG. (d) Correlation analysis on T<sub>EM</sub> cells (%) and T<sub>CM</sub> cells (%) with SARS-CoV-2 specific IgG. (e) Correlation analysis on T<sub>H1</sub>, T<sub>H2</sub>, T<sub>H17</sub> and T<sub>REG</sub> cells (%) with SARS-CoV-2 specific IgG. Each dot represents an individual subject. Measured chemiluminescence values divided by the cutoff (S/CO) were used to present the antibody level. P value was analyzed by two-tailed Pearson correlation coefficient.

Figure S3

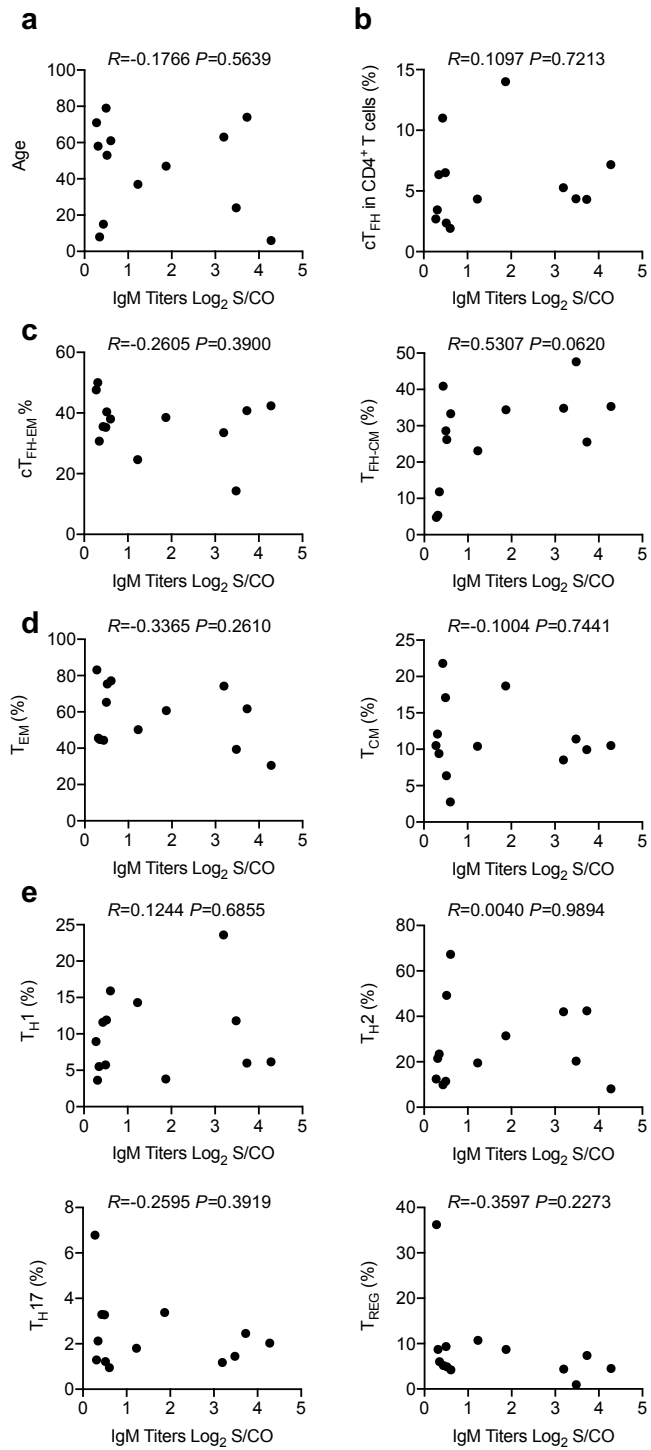

**Figure S3. Correlation analysis on SARS-CoV-2 specific IgM antibody titer**

Blood samples were collected from COVID-19 convalescent patients (n=13) and healthy individuals (n=13). Plasma were obtained after processing the blood to detect the antibodies specific to SARS-CoV-2 using chemiluminescent immunoassays (CLIA). (a) Correlation between age and SARS-CoV-2 specific IgM antibody titer. (b) Correlation between cT<sub>FH</sub> cells (%) and SARS-CoV-2 specific IgM antibody titer. (c) Correlation analysis on cT<sub>FH-EM</sub> cells (%) and cT<sub>FH-CM</sub> cells (%) with SARS-CoV-2 specific IgM. (d) Correlation analysis on T<sub>EM</sub> cells (%) and T<sub>CM</sub> cells (%) with SARS-CoV-2 specific IgM. (e) Correlation analysis on T<sub>H1</sub>, T<sub>H2</sub>, T<sub>H17</sub> and T<sub>REG</sub> cells (%) with SARS-CoV-2 specific IgM. Each dot represents an individual subject. Measured chemiluminescence values divided by the cutoff (S/CO) were used to present the antibody level. P value was analyzed by two-tailed Pearson correlation coefficient.

Figure S4

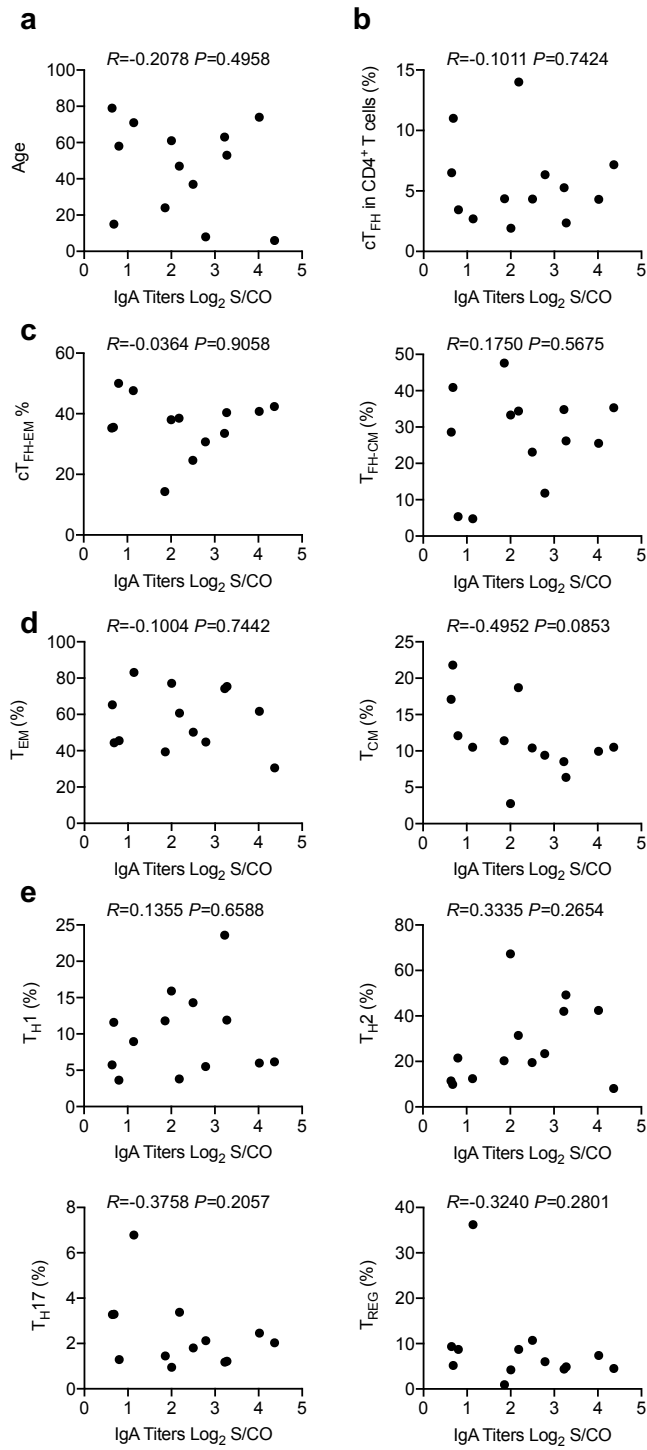

**Figure S4. Correlation analysis on SARS-CoV-2 specific IgA antibody titer**

Blood samples were collected from COVID-19 convalescent patients (n=13) and healthy individuals (n=13). Plasma were obtained after processing the blood to detect the antibodies specific to SARS-CoV-2 using chemiluminescent immunoassays (CLIA). (a) Correlation between age and SARS-CoV-2 specific IgA antibody titer. (b) Correlation between cT<sub>FH</sub> cells (%) and SARS-CoV-2 specific IgA antibody titer. (c) Correlation analysis on cT<sub>FH-EM</sub> cells (%) and cT<sub>FH-CM</sub> cells (%) with SARS-CoV-2 specific IgA. (d) Correlation analysis on T<sub>EM</sub> cells (%) and T<sub>CM</sub> cells (%) with SARS-CoV-2 specific IgA. (e) Correlation analysis on T<sub>H1</sub>, T<sub>H2</sub>, T<sub>H17</sub> and T<sub>REG</sub> cells (%) with SARS-CoV-2 specific IgA. Each dot represents an individual subject. Measured chemiluminescence values divided by the cutoff (S/CO) were used to present the antibody level. P value was analyzed by two-tailed Pearson correlation coefficient.

**Figure S5**

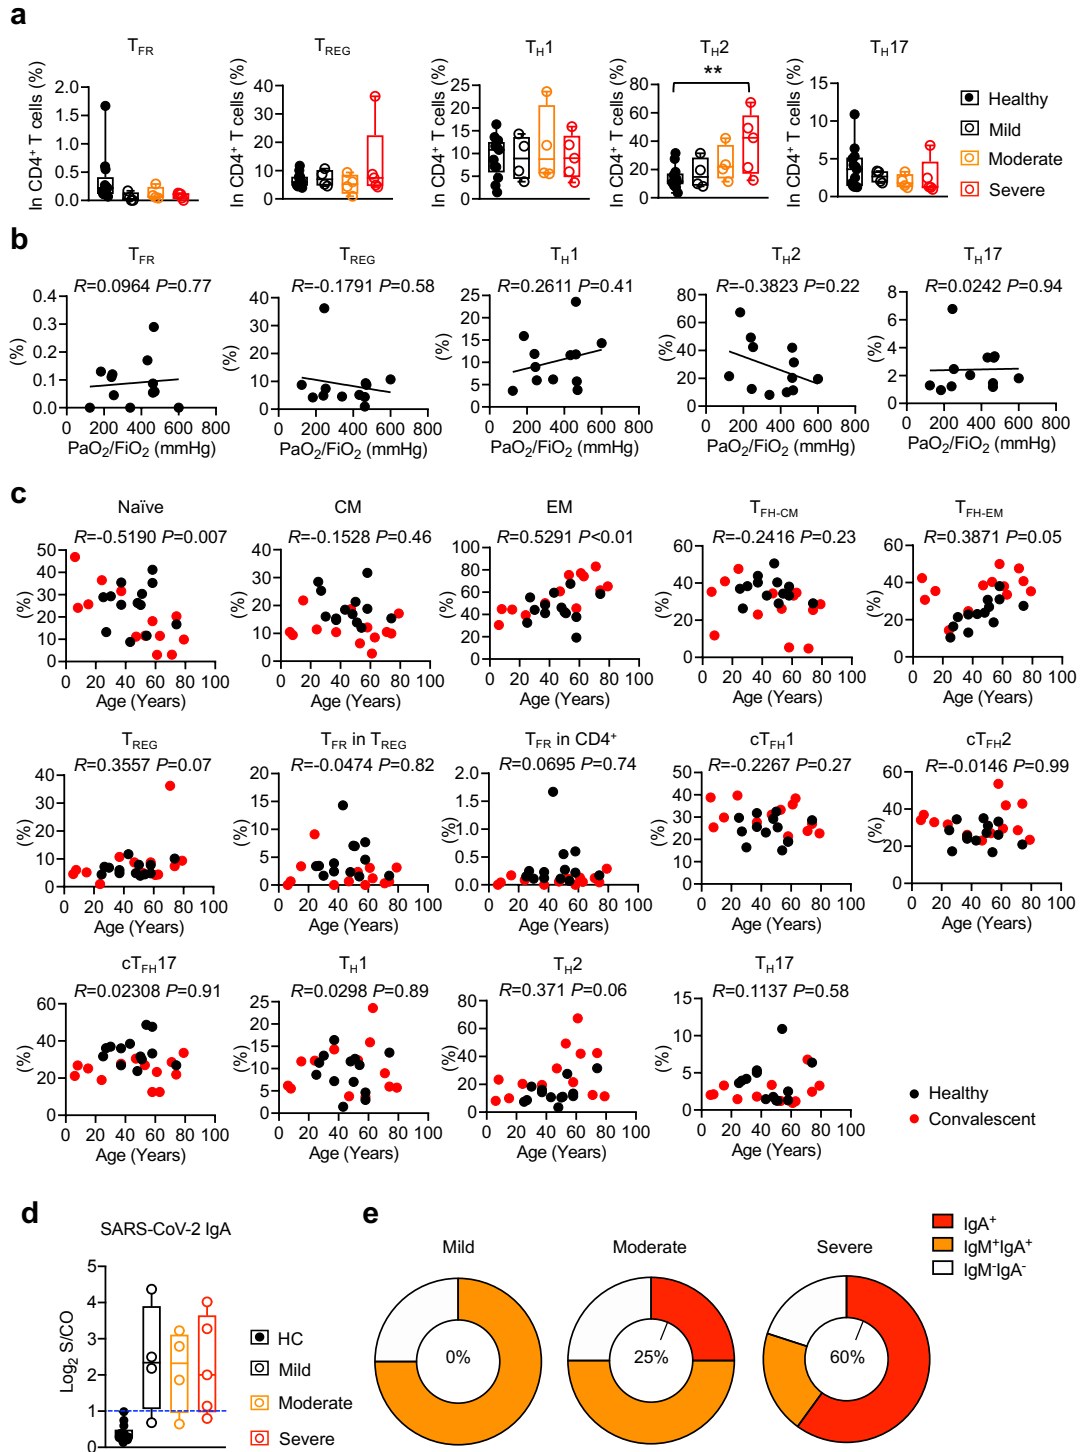



**Figure S5. CD4<sup>+</sup> T cell subsets in different COVID-19 convalescent groups and correlation analysis with age**

(a) Statistics showing the frequency of T<sub>FR</sub>, T<sub>REG</sub>, T<sub>H1</sub>, T<sub>H2</sub> and T<sub>H17</sub> cells in healthy individuals and different groups of COVID-19 convalescents. Healthy individuals (n=13), mild (N=4), moderate (N=4) and severe (N=5). (b) Correlation of T<sub>FR</sub>, T<sub>REG</sub>, T<sub>H1</sub>, T<sub>H2</sub> and T<sub>H17</sub> cells and blood oxygen level (PaO<sub>2</sub>/FiO<sub>2</sub>) in COVID-19 convalescents. (c) Correlation analysis on age and different CD4<sup>+</sup> T cell subsets, black dots represent healthy individuals, red dots represent COVID-19 convalescents, overall *R* and *P* values were calculated for each graph. (d) Antibody titer of SARS-CoV-2 specific IgA from convalescent patients in different groups. (e) Ratio of IgM<sup>+</sup> (no single positive patient in this comparison), IgA<sup>+</sup> (red), IgM<sup>+</sup> IgA<sup>+</sup> (orange) and IgM<sup>-</sup> IgA<sup>-</sup> (white) individuals (based on the produced antibody type) in mild, moderate and severe group; percentages in the central circle represent the ratio of IgA<sup>+</sup> individual in each group. Each dot represents an individual subject. Box plot show min to max. \**P*<0.05 and \*\* *P*<0.01 by One-way ANOVA test or two-tailed Pearson correlation coefficient.

**Supplementary Table 1 Clinical and pathological characteristics of each COVID-19 convalescent patient**

| Pt#  | Type     | Sex | Age | Travel in Hubei | Signs and symptoms at admission |         |       |                   |          |                  |         |                      | PaO <sub>2</sub> /FiO <sub>2</sub> during hospitalization (mmHg) | Days in hospital | Days since negative PCR for virus |
|------|----------|-----|-----|-----------------|---------------------------------|---------|-------|-------------------|----------|------------------|---------|----------------------|------------------------------------------------------------------|------------------|-----------------------------------|
|      |          |     |     |                 | Fever                           | Fatigue | Cough | Muscular soreness | Diarrhea | Chest congestion | NA test | CT scan              |                                                                  |                  |                                   |
| #101 | Mild     | F   | 47  | No              | No                              | No      | No    | Yes               | No       | No               | P       | No abnormal density  | 471                                                              | 10               | 33                                |
| #102 | Severe   | M   | 71  | Yes             | Yes                             | No      | Yes   | No                | No       | Yes              | P       | Bilateral pneumonia  | 245                                                              | 30               | 58                                |
| #103 | Mild     | M   | 15  | Yes             | No                              | No      | Yes   | No                | No       | No               | P       | No abnormal density  | 433                                                              | 24               | 28                                |
| #104 | Severe   | M   | 53  | No              | Yes                             | No      | No    | No                | No       | No               | P       | Bilateral pneumonia  | 240                                                              | 8                | 27                                |
| #105 | Mild     | M   | 6   | No              | No                              | No      | No    | No                | No       | No               | P       | No abnormal density  | 340                                                              | 22               | 26                                |
| #106 | Severe   | M   | 74  | No              | No                              | No      | Yes   | No                | No       | No               | P       | Bilateral pneumonia  | 252                                                              | 23               | 27                                |
| #107 | Moderate | F   | 63  | No              | No                              | No      | No    | Yes               | No       | No               | P       | Bilateral pneumonia  | 462                                                              | 17               | 29                                |
| #108 | Moderate | M   | 79  | No              | Yes                             | Yes     | Yes   | No                | No       | No               | P       | Unilateral pneumonia | 467                                                              | 9                | 69                                |
| #109 | Moderate | F   | 24  | No              | Yes                             | No      | No    | No                | Yes      | No               | P       | Unilateral pneumonia | 462                                                              | 26               | 28                                |
| #110 | Severe   | F   | 61  | No              | Yes                             | No      | No    | No                | No       | Yes              | P       | Bilateral pneumonia  | 183                                                              | 32               | 29                                |
| #111 | Severe   | M   | 58  | No              | Yes                             | No      | Yes   | No                | No       | No               | P       | Bilateral pneumonia  | 124                                                              | 33               | 57                                |
| #112 | Moderate | M   | 8   | No              | No                              | No      | Yes   | No                | No       | No               | P       | No abnormal density  | N.T.                                                             | 9                | 38                                |
| #113 | Mild     | M   | 37  | No              | Yes                             | No      | No    | No                | No       | No               | P       | No abnormal density  | 600                                                              | 26               | 15                                |

Notes: Pt, patient; F, female; M, male; P, positive; NA, SARS-CoV-2 nucleic acid; PaO<sub>2</sub>, arterial oxygen tension; FiO<sub>2</sub>, inspired oxygen fraction; N.T., not test; Days in hospital, calculation based on the results of SARS-CoV-2 nucleic acid from positive to negative.

**Supplementary Table 2 Antibodies and other key resources**

| <b>REAGENT or RESOURCE</b>                                                                        | <b>SOURCE</b>                 | <b>IDENTIFIER</b> |
|---------------------------------------------------------------------------------------------------|-------------------------------|-------------------|
| <b>Antibodies</b>                                                                                 |                               |                   |
| FITC Mouse Anti-Human CD8 (Clone:HIT8α)                                                           | BD Biosciences                | Cat#555634        |
| PerCP-Cy5.5 Mouse Anti-Human CD279 (Clone:EH12.1)                                                 | BD Biosciences                | Cat#561273        |
| PE Mouse Anti-Human CD196 (Clone:G034E3)                                                          | BioLegend                     | Cat#353410        |
| PE-CF594 Mouse Anti-Human CD25 (Clone:M-A251)                                                     | BD Biosciences                | Cat#562403        |
| PE-Cy7 Rat Anti-Human CD197 (Clone:3C12)                                                          | BD Biosciences                | Cat#557648        |
| AF 647 Rat Anti-Human CD185 (Clone:RF8B2)                                                         | BD Biosciences                | Cat#558113        |
| Alexa Fluor 700 Mouse Anti-Human CD4 (Clone:RPA-T4)                                               | BD Biosciences                | Cat#557922        |
| APC/Cyanine7 Mouse Anti-Human CD45RA (Clone:HI100)                                                | BioLegend                     | Cat#304128        |
| BV421 Mouse Anti-Human CD183 (Clone:G025H7)                                                       | BioLegend                     | Cat#353715        |
| BV510 Mouse Anti-Human CD3 (Clone:UCHT1)                                                          | BD Biosciences                | Cat#563109        |
| PE Mouse Anti-Human CD366 (Clone:7D3)                                                             | BD Biosciences                | Cat#563422        |
| PE-CF594 Mouse Anti-Human CD152 (Clone:BNI3)                                                      | BD Biosciences                | Cat#562742        |
| BV421 Mouse Anti-Human CD127 (Clone:HIL-7R-M21)                                                   | BD Biosciences                | Cat#562436        |
| <b>Chemicals, Peptides, and Recombinant Proteins</b>                                              |                               |                   |
| 7AAD Staining Solution                                                                            | BD Biosciences                | Cat#559925        |
| Lysing Solution 10X concentrate                                                                   | BD Biosciences                | Cat#349202        |
| Human BD Fc Block                                                                                 | BD Biosciences                | Cat#564219        |
| Ficoll-Paque™ PLUS Media                                                                          | GE Healthcare Life Sciences   | Cat#17144002      |
| FBS                                                                                               | Gibco                         | Cat#10100147      |
| <b>Critical Commercial Assays</b>                                                                 |                               |                   |
| Anti-SARS-CoV-2 IgG MCLIA kit                                                                     | Bioscience                    | Cat#G202004314    |
| Anti-SARS-CoV-2 IgM MCLIA kit                                                                     | Bioscience                    | Cat#G202004304    |
| MILLIPLEX <sub>Map</sub> Human high sensitivity T cell panel (21-plex)-Immunology Multiplex Assay | Merck Millipore               | Cat#HSTCMAG-28SK  |
| Kappa light chain reagent                                                                         | Beckman Coulter life Sciences | Cat#446440        |
| Lambda light chain reagent                                                                        | Beckman Coulter life Sciences | Cat#446470        |
| Complement 3 reagent                                                                              | Beckman Coulter life Sciences | Cat#446450        |
| Complement 4 reagent                                                                              | Beckman Coulter life Sciences | Cat#446490        |
| Anti-streptolysin O reagent                                                                       | Beckman Coulter life Sciences | Cat#447620        |
| C reactive protein reagent                                                                        | Beckman Coulter life Sciences | Cat#447280        |
